# Supplementary material
Source: publisher site journal article supplement (https://www.spandidos-publications.com/8419/downloadSupplementary)

Figure S1. Temperature monitoring during TTFIELDS exposure before and after thermal compensation. (A) Medium temperature profiles measured during TTFIELDS exposure prior to thermal compensation. A modest increase in medium temperature was observed compared with the control condition. (B) Temperature profiles after thermal compensation achieved by incubator adjustment. Similar temperature profiles were maintained between control and TTFIELDS-exposed cultures throughout the exposure period. TTFIELDS, tumor treating fields.

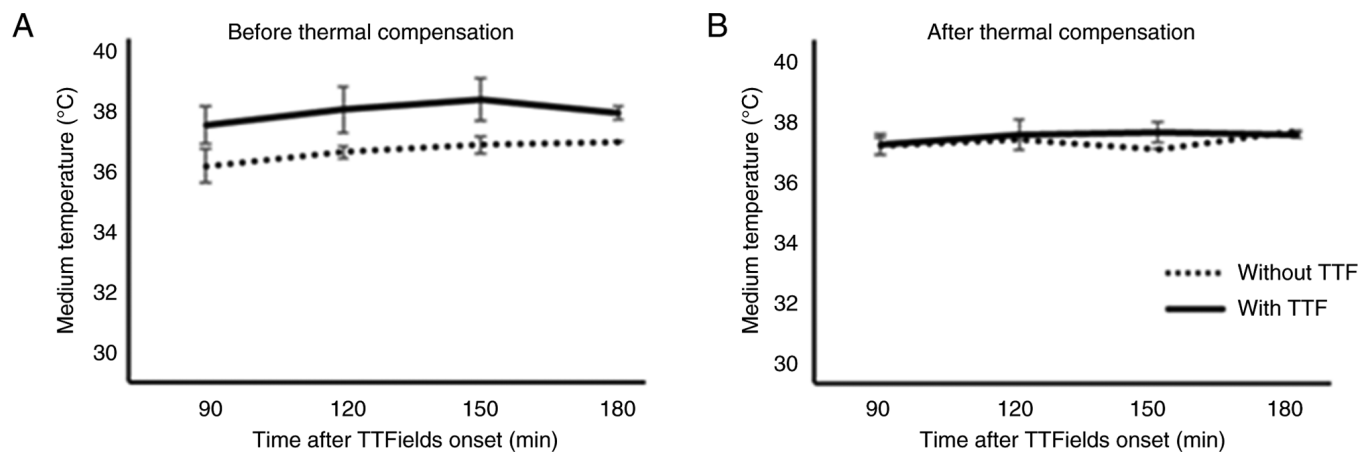

Supplement: Supplementary file 1 [file downloadSupplementary]
